# Supplementary material for: Triplet-state dynamics of a metalloporphyrin photosensitiser (PtTMPyP4) in the presence of halides and purine mononucleotides
Source: Royal Society of Chemistry journal article supplement (doi:10.1039/c1pp05125c), 2011-07-12
Supplement: c1pp05125c.pdf [file c1pp05125c.pdf]

## Supporting Information for

# Triplet state dynamics of a metalloporphyrin photosensitiser (PtTMPyP4) in the presence of halides and 5'-purine mononucleotides

Páraic M. Keane\*<sup>a</sup> and John M. Kelly<sup>b</sup>

## Contents

**Fig. S1:** Lifetime decays and steady-state spectra for quenching of PtTMPyP4 by NaCl

**Fig. S2:** Lifetime decays and steady-state spectra for quenching of PtTMPyP4 by NaBr

**Fig. S3:** lifetime and steady-state Stern-Volmer plots for quenching of PtTMPyP4 by NaBr

**Fig. S4:** UV/vis spectra of Soret band region of PtTMPyP4-GMP complexes

**Fig. S5:** Benesi-Hildebrand binding plots for PtTMPyP4-GMP complexes

**Fig. S6:** Stern-Volmer plot for addition of NaCl to PtTMPyP4-AMP complex

**Fig. S7:** Triplet-triplet decay kinetics for PtTMPyP4 in aerated 50 mM Na-phosphate buffer solution

**Fig. S8:** Triplet-triplet decay kinetics for PtTMPyP4 with 10 mM AMP aerated 50mM Na-phosphate buffer solution

**Fig. S9:** Stern-Volmer plots for long lifetime component in aerated and deoxygenated PtTMPyP4-GMP complexes derived from T-T absorption kinetics

**Fig. S10:** Triplet-triplet decay kinetics for PtTMPyP4 in near-IR aerated 50mM Na-phosphate buffer solution

**Fig S11:** Triplet-triplet decay kinetics for PtTMPyP4 with 10 mM GMP in near-IR in aerated 50mM Na-phosphate buffer solution

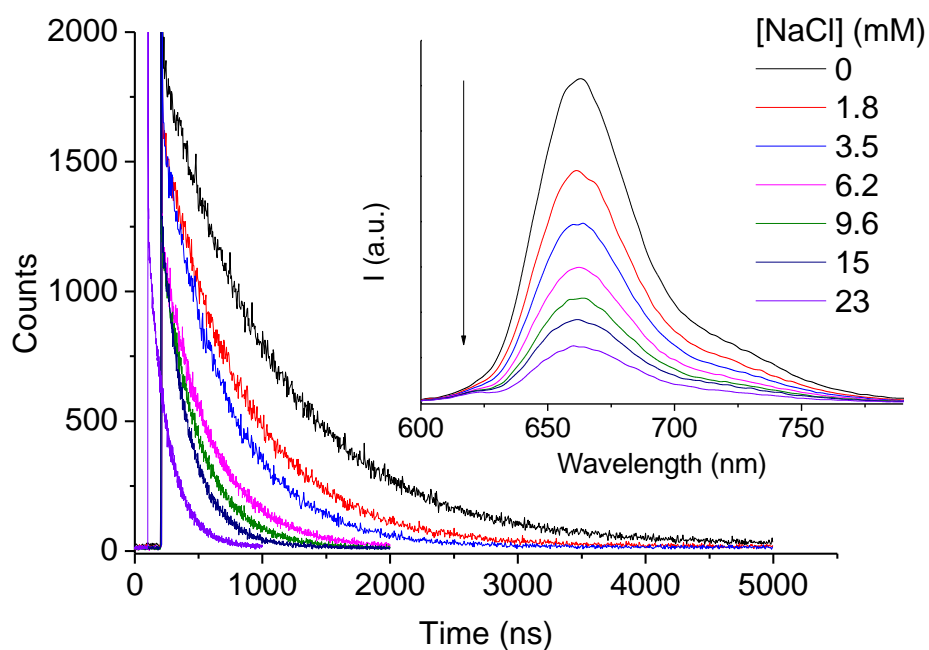

**Fig S1:** Single-photon counting decays ( $\lambda_{\text{exc}} = 371 \text{ nm}$ ,  $\lambda_{\text{em}} = 665 \text{ nm}$ ). and inset: steady-state spectra for quenching of  $5 \mu\text{M}$  PtTMPyP4 by NaCl ( $\lambda_{\text{exc}} = 513 \text{ nm}$ ) in aerated 50 mM phosphate buffer

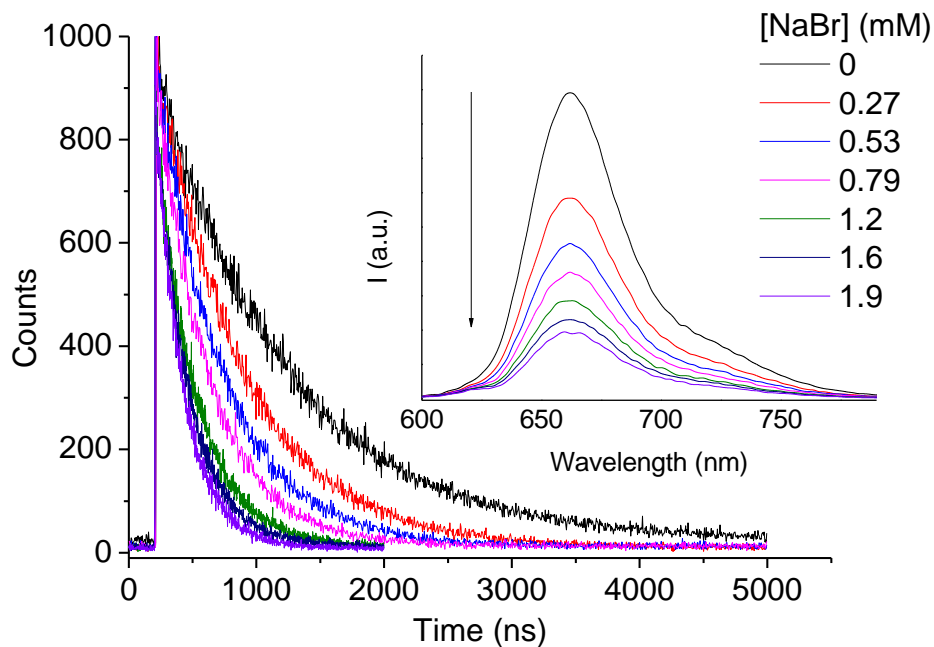

**Fig S2:** Single-photon counting decays ( $\lambda_{\text{exc}} = 371 \text{ nm}$ ,  $\lambda_{\text{em}} = 665 \text{ nm}$ ). and inset: steady-state spectra for quenching of  $5 \mu\text{M}$  PtTMPyP4 by NaBr ( $\lambda_{\text{exc}} = 513 \text{ nm}$ ) in aerated 50 mM phosphate buffer

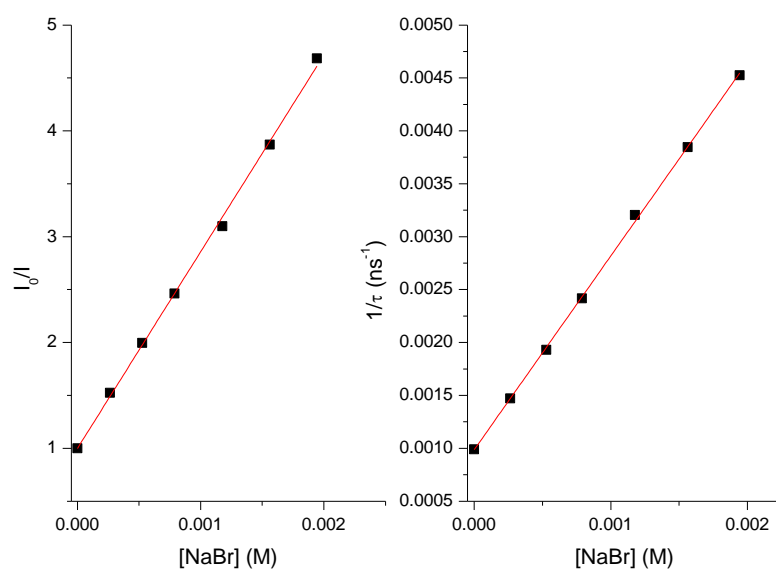

**Fig. S3:** Stern-Volmer plots for phosphorescence of PtTMPyP4 in the presence of NaBr in 50 mM phosphate buffer for (a) steady-state ( $\lambda_{\text{exc}} = 513$  nm,  $\lambda_{\text{em}} = 665$  nm) and (b) time-resolved data ( $\lambda_{\text{exc}} = 371$  nm,  $\lambda_{\text{em}} = 665$  nm).

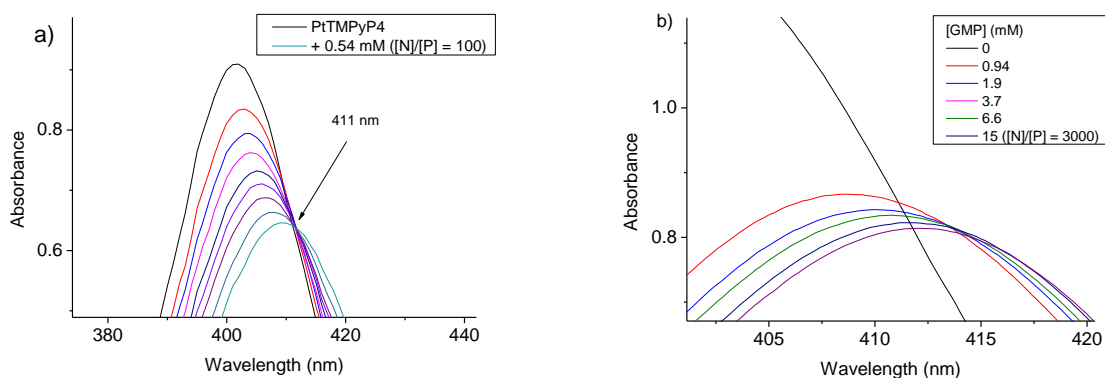

**Fig. S4:** UV/vis absorption spectra of Soret region of PtTMPyP4 in the presence of GMP in 50 mM phosphate buffer (a) at low GMP conc. (b) at high GMP conc.

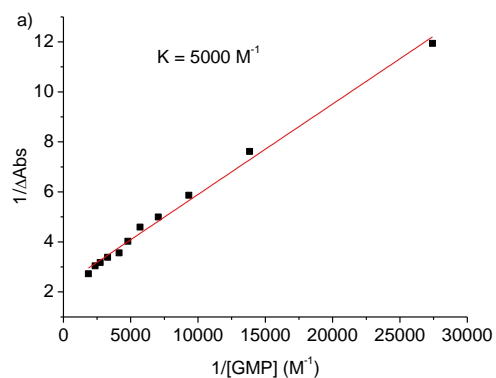

**Fig. S5:** Benesi-Hildebrand fits to UV/vis absorption spectra of PtTMPyP4 in the presence of low GMP concentrations ( $< 0.5 \text{ mM}$ ) in 50 mM phosphate buffer.

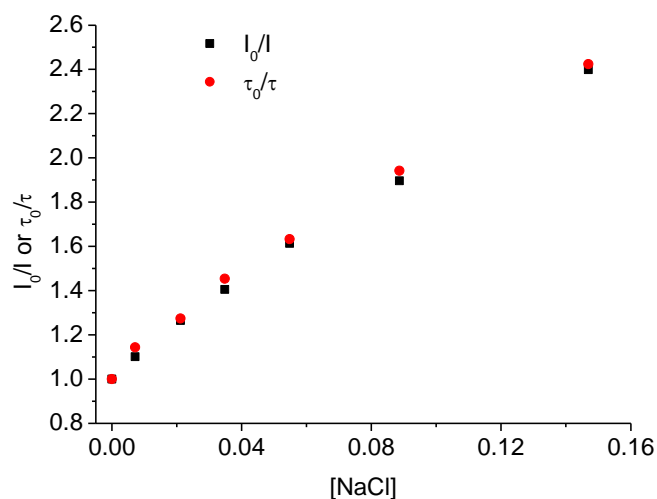

**Fig. S6:** Combined steady-state ( $\lambda_{\text{exc}} = 517 \text{ nm}$ ) and lifetime ( $\lambda_{\text{exc}} = 370 \text{ nm}$ ,  $\lambda_{\text{em}} = 675 \text{ nm}$ ) Stern-Volmer plots for PtTMPyP4-AMP complex in presence of NaCl in aerated 50 mM phosphate buffer solution.  $[\text{PtTMPyP4}] = 5 \text{ }\mu\text{M}$ ,  $[\text{AMP}] = 15 \text{ mM}$ .

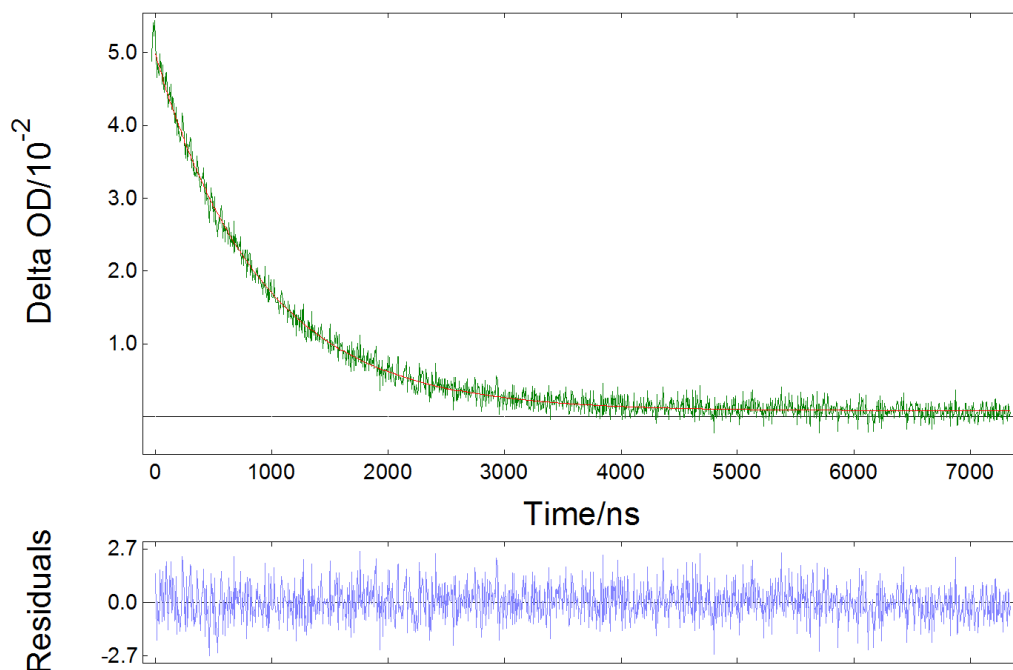

**Fig. S7:** Monoexponential fit of triplet-triplet absorption spectrum of 6  $\mu\text{M}$  PtTMPyP4 in aerated 50 mM Na-phosphate buffer solution. Recorded at 440 nm ( $\lambda_{\text{exc}} = 355$  nm)  $\tau = 932$  ns.

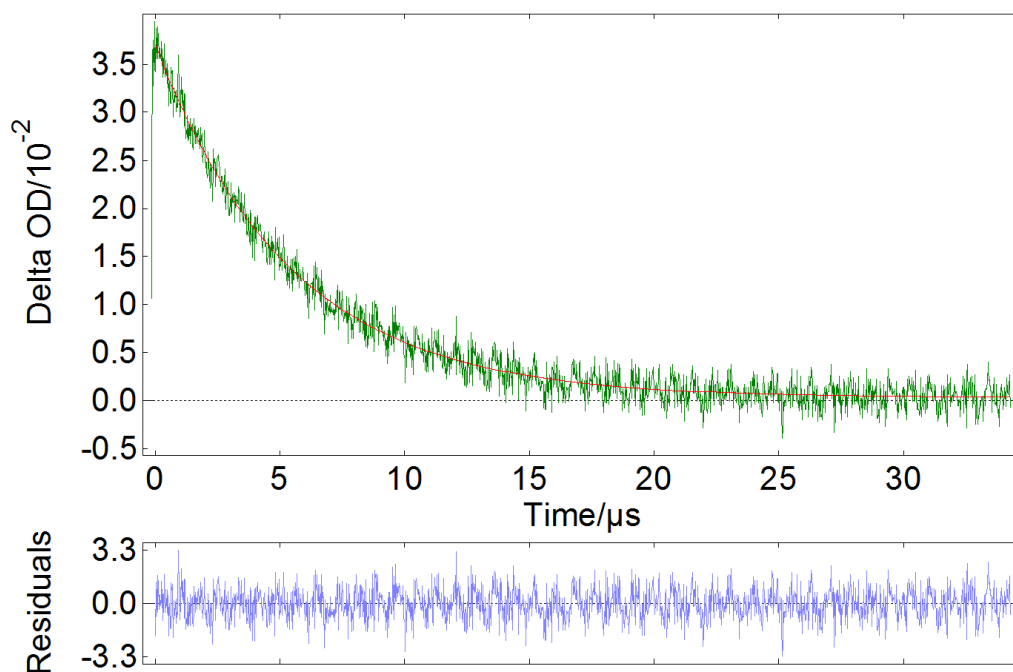

**Fig. S8:** Monoexponential fit of T-T absorption spectrum of 6  $\mu\text{M}$  PtTMPyP4 in the presence of AMP (10 mM) in aerated 50mM Na-phosphate buffer solution. Recorded at 460 nm ( $\lambda_{\text{exc}} = 355$  nm)  $\tau = 5650$  ns

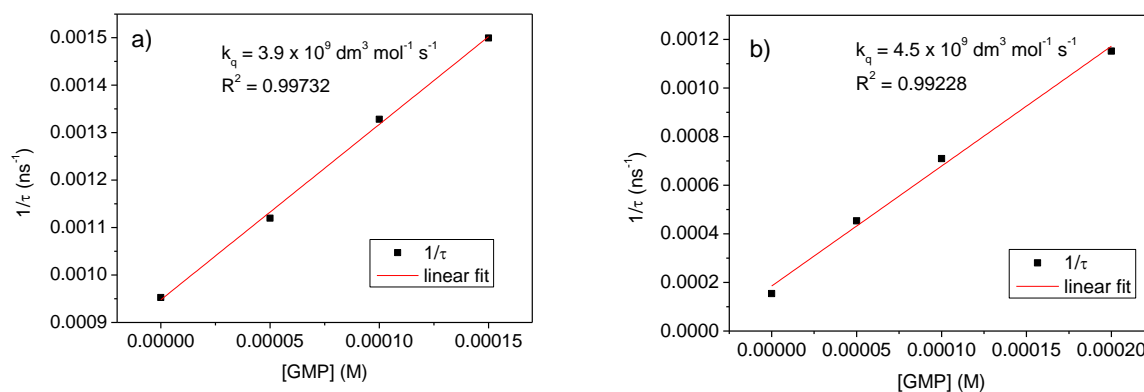

**Fig. S9:** Stern-Volmer plots for long lifetime component of PtTMPyP4 in presence of GMP calculated from T-T absorption decays at 450 nm in a) aerated solution b) deoxygenated solution. Both in 50 mM Na-phosphate buffer,  $\lambda_{\text{exc}} = 355 \text{ nm}$

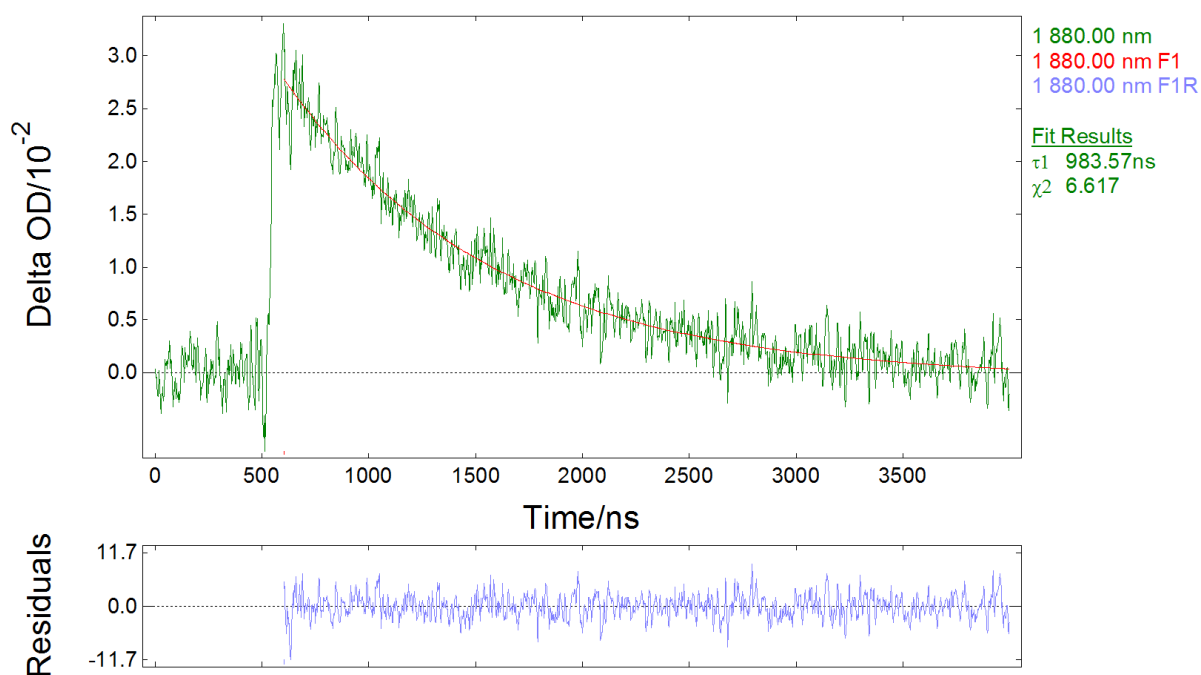

**Fig. S10** Monoexponential fit of T-T absorption spectrum of 6  $\mu\text{M}$  PtTMPyP4 in aerated 50 mM Na-phosphate buffer solution. Recorded at 880 nm ( $\lambda_{\text{exc}} = 355 \text{ nm}$ )

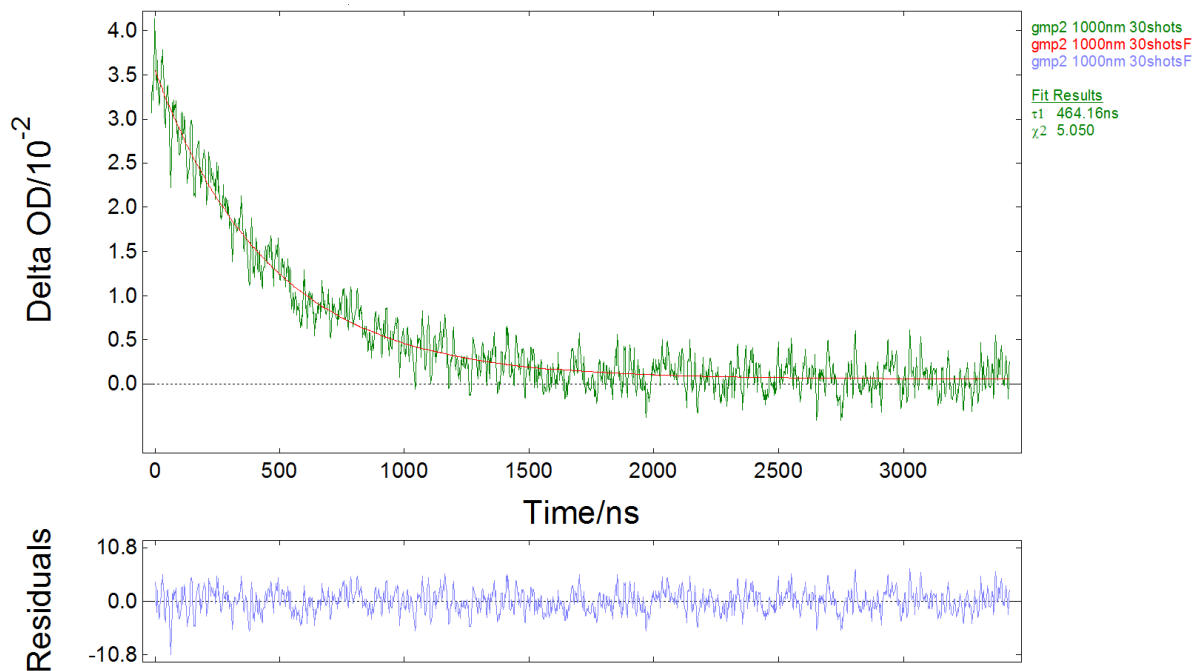

**Fig. S11** Monoexponential fit of T-T absorption spectrum of 6 mM PtTMPyP4 in presence of GMP (10 mM) aerated 50mM Na-phosphate buffer solution. Recorded at 1000 nm ( $\lambda_{\text{exc}} = 355$  nm)
